1

Version dated: March 3, 2017

2 SOFTWARE FOR SYSTEMATICS AND EVOLUTION

3 **POUMM: An R-package for Bayesian Inference of**  
4 **Phylogenetic Heritability**

5 VENELIN MITOV<sup>1,2</sup>, TANJA STADLER<sup>1,2</sup>

6 <sup>1</sup>*Swiss Federal Institute of Technology in Zurich, Switzerland;*

7 <sup>2</sup>*Swiss Institute of Bioinformatics, Switzerland*

8 **Corresponding authors:** Venelin Mitov, Department of Biosystem Sciences and  
9 Engineering, Swiss Federal Institute of Technology, Mattenstrasse 26, CH-4058 Basel,  
10 Switzerland; E-mail: vmitov@gmail.com.

11 *Abstract.*—The Phylogenetic Ornstein-Uhlenbeck Mixed Model (POUMM) allows to  
12 estimate the phylogenetic heritability of continuous traits, to test hypotheses of neutral  
13 evolution versus stabilizing selection, to quantify the strength of stabilizing selection, to  
14 estimate measurement error and to make predictions about the evolution of a phenotype  
15 and phenotypic variation in a population. Despite this variety of applications, currently,  
16 there are no R-packages supporting POUMM inference on large non-ultrametric  
17 phylogenetic trees. Large phylogenies of that kind are becoming increasingly available,  
18 predominantly in epidemiology, where transmission trees are inferred from pathogen  
19 sequences during epidemic outbreaks, but also in some macroevolutionary studies

20 incorporating fossil and contemporary data. In this article, we propose the R-package  
21 **POUMM**, providing Bayesian inference of the model parameters on large phylogenetic  
22 trees. We describe a novel breadth-first pruning algorithm for fast likelihood calculation,  
23 enabling highly parallelizable likelihood calculation on multi-core systems and GPUs. We  
24 report simulation-based results proving the technical correctness and performance of the  
25 software.

26 Keywords: PMM, Brownian motion, Ornstein-Uhlenbeck, measurement error, Bayesian  
27 inference

28 The past decades have seen active development of phylogenetic models of  
29 continuous trait evolution, progressing from null neutral models, such as single-trait  
30 Brownian motion (BM), to complex multi-trait models incorporating selection, interaction  
31 between trait-values and diversification, and co-evolution of multiple traits (O’Meara 2012;  
32 Manceau, Lambert, and Morlon 2016). Fitting these models to data has become possible  
33 thanks to a growing collection of software packages, many of which written in the R  
34 language of statistical computing (R Core Team 2013) and freely available on the  
35 Comprehensive R Archive Network (CRAN) (O’Meara 2016).

36 The **phylogenetic heritability**, introduced with the phylogenetic mixed model  
37 (PMM) (Housworth, Martins, and Lynch 2004), measures the proportion of phenotypic  
38 variance in a population attributable to heritable factors, such as genes, as opposed to  
39 non-heritable factors, such as environment and measurement error. Although the concept  
40 of phylogenetic heritability has been applied mostly in the context of the original PMM,

41 i.e. under the assumption of Brownian motion, the same concept applies to any  
42 evolutionary model allowing for the estimation of measurement error (ME) (Hansen and  
43 Bartoszek 2012). In its simplest form this means adding a white noise error term to the  
44 modeled trait-value. Therefore, it comes as a surprise that most recently published  
45 R-packages for phylogenetic analysis on large trees have very limited support for estimating  
46 ME and, thus, phylogenetic heritability. To give a few examples, the package Rphylopars  
47 (Goolsby, Bruggeman, and Ané 2016) allows for the estimation of intraspecies standard  
48 error only when the tips in the phylogeny are grouped with several tips per species;  
49 diversitree (FitzJohn 2012) only allows for the specification of a parameter `states.sd`  
50 through a call to `make.bm` or another function, but does not fit this parameter; geiger  
51 (Pennell et al. 2014) allows for fitting a standard error (SE), but similarly to diversitree  
52 and Rphylopars, does not support likelihood calculation on non-ultrametric trees; GLSME  
53 (Hansen and Bartoszek 2012) and RPANDA (Manceau, Lambert, and Morlon 2016) have a  
54 rich ME-support for both, ultrametric and non-ultrametric trees, but do not provide fast  
55 likelihood calculation on large trees.

56 Here, we introduce the R-package **POUMM** providing Bayesian inference of  
57 phylogenetic heritability for traits evolving under stabilizing selection. Formally, this is an  
58 extension of the PMM, replacing the Brownian motion process by an Ornstein-Uhlenbeck  
59 process with a single global optimum (Ornstein and Zernike 1919; Uhlenbeck and Ornstein  
60 1930). The package implements a highly parallelizable breadth-first pruning algorithm for  
61 fast likelihood calculation on large ultrametric and non-ultrametric trees including  
62 polytomies. The same algorithm can be extended to multi-trait scenarios with different  
63 model-regimes assigned to different phylogenetic lineages. We present the model, the  
64 algorithm and simulation based results for validation of the technical correctness and  
65 performance of the software.

66 Through the rest of the article we will rely on the following setup. Given is a rooted

67 phylogenetic tree  $\mathcal{T}$  with  $N$  tips indexed by  $1, \dots, N$  and a root node, 0 (Fig. 1). Without  
 68 restrictions on the tree topology, non-ultrametric trees (i.e. tips have different time-distance  
 69 from the root) and polytomies (i.e. nodes with any finite number of descendants) are  
 70 accepted. Internal nodes are indexed by the numbers  $N + 1, \dots$ . Associated with the tips is  
 71 a  $N$ -vector of observed real trait-values denoted by  $\mathbf{z}$ . We denote by  $\mathcal{T}_i$  the subtree rooted  
 72 at node  $i$  and by  $\mathbf{z}_i$  the set of values at the tips belonging to  $\mathcal{T}_i$ . For any internal node  $j$ ,  
 73 we denote by  $Desc(j)$  the set of its direct descendants. Furthermore, for any  $i \in Desc(j)$ ,  
 74 we denote by  $t_{ji}$  the length of the edge connecting  $j$  with  $i$  and by  $t_{0i}$  the sum of  
 75 edge-lengths (time-distance) from the root to  $i$ . For two tips  $i$  and  $k$ , we denote by  $t_{0(ik)}$   
 76 the time-distance from the root to their most recent common ancestor (mrca), and by  $\tau_{ik}$   
 77 the sum of edge-lengths on the path from  $i$  to  $k$  (also called phylogenetic/patristic distance  
 78 between  $i$  and  $k$ ). We use the symbol  $\bar{t}$  to denote the mean root-tip distance in the tree.  
 79 For converting branch-lengths in time-units into absolute time, by convention, the origin of  
 80 time, 0, is assumed to be at the root, and the time is increasing positively towards the tips.

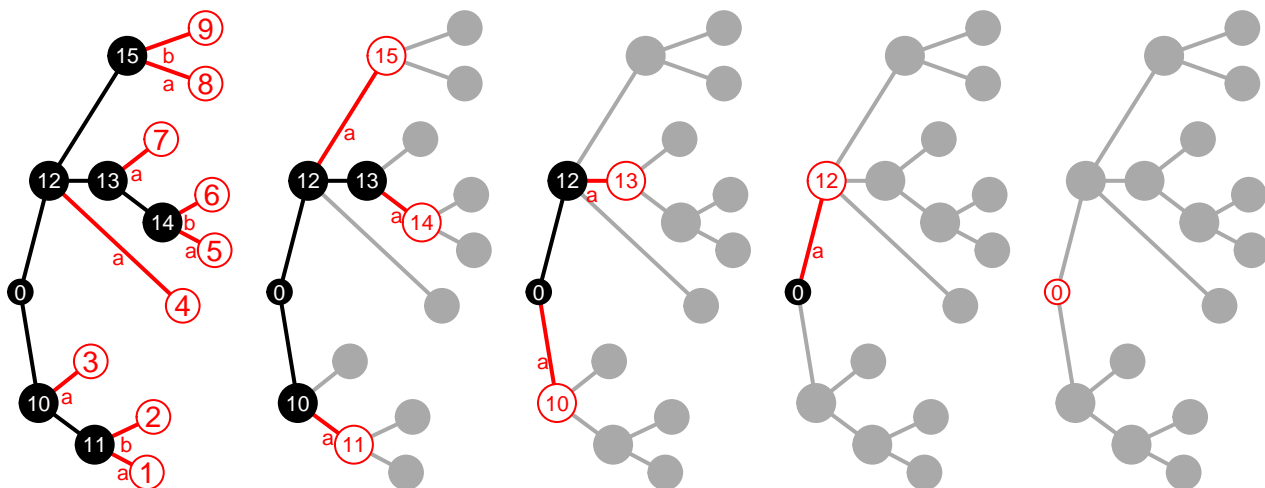

Figure 1: Breadth-first pruning on a tree with  $N = 10$  tips. Each tree from left to right depicts one pruning iteration; black: non-tip nodes at a current pruning step; red: tip nodes to be pruned; grey: pruned nodes. Letters ‘a’ and ‘b’ next to branches denote the order in which the coefficients  $a_{ji}$ ,  $b_{ji}$ ,  $c_{ji}$  are added to their parent’s  $a_j$ ,  $b_j$  and  $c_j$  (algorithm 1).

# THE PHYLOGENETIC ORNSTEIN-UHLENBECK MIXED MODEL

The phylogenetic Ornstein-Uhlenbeck mixed model (POUMM) decomposes the trait value as a sum of a non-heritable component,  $e$ , and a genetic component,  $g$ , which (i) evolves continuously according to an Ornstein-Uhlenbeck (OU) process along branches; (ii) gets inherited by the branches descending from each internal node. In biological terms,  $g$  is a genotypic value (Lynch and Walsh 1998) that evolves according to random drift with stabilizing selection towards a global optimum;  $e$  is a non-heritable component, which can be interpreted in different ways, depending on the application, i.e. a measurement error, an environmental contribution, a residual with respect to a model prediction, or the sum of all these. The OU-process acting on  $g$  is parameterized by an initial genotypic value at the root,  $g_0$ , a global optimum,  $\theta$ , a selection strength,  $\alpha > 0$ , and a random drift unit-time standard deviation,  $\sigma$ . Denoting by  $W_t$  the standard Wiener process (Grimmett and Stirzaker 2001), the evolution of the trait-value,  $z(t)$ , along a given lineage of the tree is described by the equations:

$$z(t) = g(t) + e \quad (1)$$

$$dg(t) = \alpha[\theta - g(t)]dt + \sigma dW_t, \quad (2)$$

The stochastic differential equation 2 defines the OU-process, which represents a random walk tending towards the global optimum  $\theta$  with stronger attraction for bigger difference between  $g(t)$  and  $\theta$  (Ornstein and Zernike 1919; Uhlenbeck and Ornstein 1930). The model assumptions for  $e$  are that they are iid normal with mean 0 and standard deviation  $\sigma_e$  at the tips. Any process along the tree that gives rise to this distribution at the tips may be assumed for  $e$ . For example, in the case of epidemics, a newly infected individual is

102 assigned a new  $e$ -value which represents the contribution from its immune system and this  
103 value can change or remain constant throughout the course of infection. In the case of  
104 macroevolution,  $e$  may represent the ecological (non-genetic) differences between species.  
105 In particular, the non-heritable component  $e$  does not influence the behavior of the  
106 OU-process  $g(t)$ . Thus, if we were to simulate trait values  $z$  on the tips of a phylogenetic  
107 tree  $\mathcal{T}$ , we could first simulate the OU-process from the root to the tips to obtain  $g$ , and  
108 then add the white noise  $e$  (i.e. an iid draw from a normal distribution) to each simulated  $g$   
109 value at the tips.

110 The POUMM represents an extension of the phylogenetic mixed model (PMM)  
111 (Lynch 1991; Housworth, Martins, and Lynch 2004), since, in the limit  $\alpha \rightarrow 0$ , the  
112 OU-process converges to a Brownian motion (BM) with unit-time standard deviation  $\sigma$ .  
113 Both, the POUMM and the PMM, define an expected multivariate normal distribution for  
114 the trait values at the tips. Note that the trait expectation and variance for a tip  $i$  depends  
115 on its time-distance from the root ( $t_{0i}$ ), and the trait covariance for a pair of tips ( $ij$ )  
116 depends on the time-distance from the root to their mrca ( $t_{0(ij)}$ ), as well as their patristic  
117 distance ( $\tau_{ij}$ ) (table 1).

118 We note that the expressions for the expected variance-covariance matrix of the  
119 POUMM are only defined for strictly positive  $\alpha$ . We obtain the limit for PMM by noting  
120 that  $\lim_{\alpha \rightarrow 0} \alpha / (1 - e^{\alpha t}) = -1/t$ .

### 121 *Phylogenetic heritability*

122 The **phylogenetic heritability** is defined as the expected proportion of  
123 phenotypic variance attributable to  $g$  at the tips of the tree,  $\sigma^2(g) / [\sigma^2(g) + \sigma_e^2]$   
124 (Housworth, Martins, and Lynch 2004). This definition is a phylogenetic variant of the  
125 definition of broad-sense heritability,  $H^2$ , from quantitative genetics (Lynch and Walsh  
126 1998). However, in the case of a trait evolving along a phylogeny, the expected genotypic

Table 1: Population properties at the tips of the phylogeny under POUMM and PMM.  $\mu_i$ : expected value at tip  $i$ ;  $\Sigma_{ii}$ : expected variance for tip  $i$ ;  $\Sigma_{ij}$ : expected covariance of the values of tips  $i$  and  $j$ ;  $H_{\bar{t}}^2$ : phylogenetic heritability at mean root-tip distance;  $H_{\infty}^2$ : phylogenetic heritability at long-term equilibrium;  $H_e^2$ : time-independent (empirical) phylogenetic heritability.

|                                      | POUMM                                                                                                  | PMM ( $\alpha \rightarrow 0$ )                       |
|--------------------------------------|--------------------------------------------------------------------------------------------------------|------------------------------------------------------|
| $\Theta$ :                           | $\langle g_0, \alpha, \theta, \sigma, \sigma_e \rangle$                                                | $\langle g_0, \sigma, \sigma_e \rangle$              |
| $\mu_i(\Theta, \mathcal{T})$ :       | $e^{-\alpha t_{0i}} g_0 + (1 - e^{-\alpha t_{0i}}) \theta$                                             | $g_0$                                                |
| $\Sigma_{ii}(\Theta, \mathcal{T})$ : | $\sigma^2 \frac{(1 - e^{-2\alpha t_{0i}})}{2\alpha} + \sigma_e^2$                                      | $\sigma^2 t_{0i} + \sigma_e^2$                       |
| $\Sigma_{ij}(\Theta, \mathcal{T})$ : | $\sigma^2 \frac{e^{-\alpha \tau_{ij}} (1 - e^{-2\alpha t_{0(ij)}})}{2\alpha}$                          | $\sigma^2 t_{0(ij)}$                                 |
| $H_{\bar{t}}^2$ :                    | $\frac{\sigma^2 (1 - e^{-2\alpha \bar{t}})}{\sigma^2 (1 - e^{-2\alpha \bar{t}}) + 2\alpha \sigma_e^2}$ | $\bar{t} \sigma^2 / (\bar{t} \sigma^2 + \sigma_e^2)$ |
| $H_{\infty}^2$ :                     | $\sigma^2 / (\sigma^2 + 2\alpha \sigma_e^2)$                                                           | 1                                                    |
| $H_e^2$ :                            | $1 - \sigma_e^2 / s^2(\mathbf{z})$                                                                     | $1 - \sigma_e^2 / s^2(\mathbf{z})$                   |

127 variance,  $\sigma^2(g)$ , and, therefore, the phylogenetic heritability, are functions of time. The  
 128 POUMM package reports the following three types of phylogenetic heritability (see table 1  
 129 for simplified expressions):

- 130 • Expectation at the mean root-tip distance :  
 131  $H_{\bar{t}}^2 := \left[ \sigma^2 \frac{(1 - e^{-2\alpha \bar{t}})}{2\alpha} \right] / \left[ \sigma^2 \frac{(1 - e^{-2\alpha \bar{t}})}{2\alpha} + \sigma_e^2 \right];$
- 132 • Expectation at equilibrium of the OU-process:  $H_{\infty}^2 := \lim_{\bar{t} \rightarrow \infty} H_{\bar{t}}^2;$
- 133 • Empirical (time-independent) version of the heritability based on the sample  
 134 phenotypic variance  $s^2(\mathbf{z})$  :  $H_e^2 := 1 - \sigma_e^2 / s^2(\mathbf{z}).$

## 135 ALGORITHM

136 For a fixed tree,  $\mathcal{T}$ , the log-likelihood of the observed data is defined as the function:

$$\ell\ell(\Theta) = \ln(f(\mathbf{z}_0 | \mathcal{T}, \Theta)), \quad (3)$$

137 where  $f$  denotes a probability density function (pdf) and  $\Theta = \langle g_0, \alpha, \theta, \sigma, \sigma_e \rangle$ .

138 The POUMM package uses a breadth-first variant of the pruning algorithm  
139 (Felsenstein 1973). The log-likelihood is calculated by consecutive integration over the  
140 unobservable genotypic values,  $g_i$ , progressing from the tips to the root. Central for the  
141 pruning likelihood calculation is the following theorem, for which we provide a proof in the  
142 appendix:

143 **Theorem 1** (Quadratic polynomial representation of the POUMM log-likelihood). *For*  
144  $\alpha \geq 0$ , *a real*  $\theta$  *and non-negative*  $\sigma$  *and*  $\sigma_e$ , *the POUMM log-likelihood can be expressed as a*  
145 *quadratic polynomial of*  $g_0$ :

$$\ell\ell(\Theta) = a_0 g_0^2 + b_0 g_0 + c_0, \quad (4)$$

146 *where*  $a_0 < 0$ ,  $b_0$  *and*  $c_0$  *are real coefficients. We denote by*  $u(\alpha, t)$  *the function:*

$$u(\alpha, t) := \begin{cases} \alpha/(1 - e^{\alpha t}), & \text{for } \alpha > 0 \\ -1/t, & \text{for } \alpha = 0 \end{cases} \quad (5)$$

147 *Then, the coefficients in eq. 4 can be expressed with the following recurrence relation:*

148 1. *For*  $j \in \{1, \dots, N\}$  *(tips):*

$$a_j = -\frac{1}{2\sigma_e^2}; b_j = \frac{z_j}{\sigma_e^2}; c_j = -\frac{z_j^2}{2\sigma_e^2} - \ln \sqrt{2\pi\sigma_e^2} \quad (6)$$



2. For  $j > N$  (internal nodes) or  $j = 0$  (root):

$$\begin{aligned}
 a_j &= \sum_{i \in Desc(j)} \frac{a_i u(\alpha, 2t_{ji})}{u(\alpha, 2t_{ji}) - \alpha + \sigma^2 a_i} \\
 b_j &= \sum_{i \in Desc(j)} \frac{u(\alpha, 2t_{ji}) [2\theta a_i (e^{\alpha t_{ji}} - 1) + b_i e^{\alpha t_{ji}}]}{u(\alpha, 2t_{ji}) - \alpha + \sigma^2 a_i} \\
 c_j &= \sum_{i \in Desc(j)} \left\{ c_i + \alpha t_{ji} - \frac{0.25 b_i^2 \sigma^2}{-\alpha + a_i \sigma^2 + u(\alpha, 2t_{ji})} - \right. \\
 &\quad \left. 0.5 \ln \left( \frac{-\alpha + a_i \sigma^2 + u(\alpha, 2t_{ji})}{u(\alpha, 2t_{ji})} \right) + \right. \\
 &\quad \left. \frac{\alpha \theta [a_i \theta - (b_i + a_i \theta) e^{\alpha t_{ji}}]}{u(\alpha, t_{ji}) + (-\alpha + a_i \sigma^2) (1 + e^{\alpha t_{ji}})} \right\}. \tag{7}
 \end{aligned}$$

149 It can be shown that current pruning implementations (FitzJohn 2012; Pennell et  
 150 al. 2014) rely on equivalent formulations of the above theorem. The breadth-first algorithm  
 151 differs from these implementations in the ordering of algebraic operations so that they can  
 152 be performed “at once” for groups of tips or internal nodes rather than consecutively for  
 153 individual nodes in order of depth-first traversal.

### 154 *Implementation*

155 Before model fitting, the user can choose from different POUMM parametrizations  
 156 and prior settings (function `specifyPOUMM`). Model fitting is done through a combination  
 157 of likelihood optimization and adaptive Metropolis sampling (Vihola 2012; Scheidegger  
 158 2012). A set of standard generic functions, such as `plot`, `summary`, `logLik`, `coef`, etc.,  
 159 provide means to assess the quality of a fit (i.e. MCMC convergence, consistence between  
 160 ML and MCMC fits) as well as various inferred properties, such as high posterior density  
 161 (HPD) intervals.

162 We implemented the breadth-first pruning algorithm in R and in C++ using the  
 163 library Armadillo (Sanderson and Curtin 2016) through the R-package RcppArmadillo

---

**Algorithm 1:** Breadth-first pruning

---

**Data:**  $\mathcal{T}, \mathbf{z}; \alpha, \theta, \sigma, \sigma_e$   
**Result:**  $\max_{g_0} \ell\ell(g_0, \alpha, \theta, \sigma, \sigma_e; \mathbf{z}, \mathcal{T})$   
initialization:  
for tips  $i \in \{1, \dots, N\}$ , set  $a_i, b_i, c_i$  (eq. 6);  
for nodes  $j > N$  or  $j = 0$ , set  $a_j, b_j, c_j$  to 0;  
set  $\{<ji>\}$  to the set of edges  $<ji>$  in  $\mathcal{T}$ , where  $i \in \{1, \dots, N\}$ ;  
**while**  $\{<ji>\} \neq \phi$  **do**  
    **for**  $<ji> \in \{<ji>\}$  **do**  
        // vectorized operations  
        set  $a_{<ji>}, b_{<ji>}, c_{<ji>}$  to the sub-summands in eq. 7 ;  
        add  $a_{<ji>}, b_{<ji>}, c_{<ji>}$  to  $a_j, b_j, c_j$  (see branch labels on Fig. 1);  
    **end**  
    pruning: set  $\mathcal{T}$  to the tree obtained upon removal of  $i \in \{<ji>\}$ ;  
    set  $\{i\}$  to the subset of parent nodes in  $\{<ji>\}$ , which have become tips after  
    the pruning (Fig. 1);  
    set  $\{<ji>\}$  to the edges leading to  $\{i\}$ ;  
**end**  
set  $g_0 := -0.5 b_0/a_0$ ;  
set  $\ell\ell(\Theta) := a_0 g_0^2 + b_0 g_0 + c_0$ .

---

164 (Eddelbuettel and Sanderson 2014). While slightly slower, the R implementation can  
165 switch transparently between `double` and `Rmpfr` floating point precision (Maechler 2014),  
166 thus, guaranteeing numerical stability in cases of extreme parameter values, trait values or  
167 branch lengths.

168 In addition the POUMM package uses the following third-party R-packages: `ape`  
169 `v3.4` (Paradis, Claude, and Strimmer 2004), `data.table v1.9.6` (Dowle et al. 2014) and `coda`  
170 `v0.18-1` (Plummer et al. 2006), `foreach v1.4.3` (Analytics and Weston 2015), `ggplot2 v2.1.0`  
171 `(Wickham 2009)` and `gsl v1.9-10.3` (Hankin 2006).

172 

## SIMULATIONS

173 To validate the correctness of the Bayesian POUMM implementation, we used the  
174 method of posterior quantiles (Cook, Gelman, and Rubin 2006). In this method, the idea is

175 to generate samples from the posterior quantile distributions of selected model parameters  
176 (or functions thereof) by means of numerous “replications” of simulation followed by  
177 Bayesian parameter inference. In each replication, “true” values of the model parameters  
178 are drawn from a fixed prior distribution and trait-data is simulated under the model  
179 specified by these parameter values. Then, the posterior quantiles of the “true” parameter  
180 values (or functions thereof) are calculated from the corresponding posterior samples  
181 generated by the to-be-tested software. By running in parallel multiple independent  
182 replications on a fixed prior, it is possible to generate large samples from the posterior  
183 quantile distributions of the individual model parameters, as well as any derived quantities.  
184 Assuming correctness of the simulations, any statistically significant deviation from  
185 uniformity of these posterior quantile samples indicates an error in the to-be-tested  
186 software (Cook, Gelman, and Rubin 2006).

187 In order to test the robustness of the POUMM against model mis-specifications, we  
188 extended the above approach by running POUMM inference on data simulated under pure  
189 PMM ( $\alpha = 0$ ), and PMM inference on data simulated under POUMM ( $\alpha \geq 0$ ).  
190 Simulations scenarios of 2000 replications were run on an ultrametric and non-ultrametric  
191 tree ( $N = 4000$ ), using the parametrization  $\Theta = \langle \alpha, \theta, H_t^2, \sigma_e, g_0 \rangle$  and the prior  
192  $\Theta \sim \text{Exp}(0.1) \times \mathcal{U}(2, 8) \times \mathcal{U}(0, 1) \times \text{Exp}(1) \times \mathcal{N}(5, 25)$  (Supplementary Text).

193 Without exception, both, the PMM and POUMM implementation, generate  
194 uniformly distributed posterior quantiles for all trees and all relevant parameters when the  
195 Bayesian inference has been done on data simulated under the correct simulation mode, i.e.  
196 “Simulate BM” for PMM and “Simulate OU” for POUMM. This is confirmed visually by  
197 observing the corresponding histograms on Fig. 2, as well as statistically, by a  
198 non-significant p-value from a Kolmogorov-Smirnov uniformity test at the 0.01 level. This  
199 observation validates the technical correctness of the software.

200 When fitting the PMM to simulations of stabilizing selection (OU), there is a highly

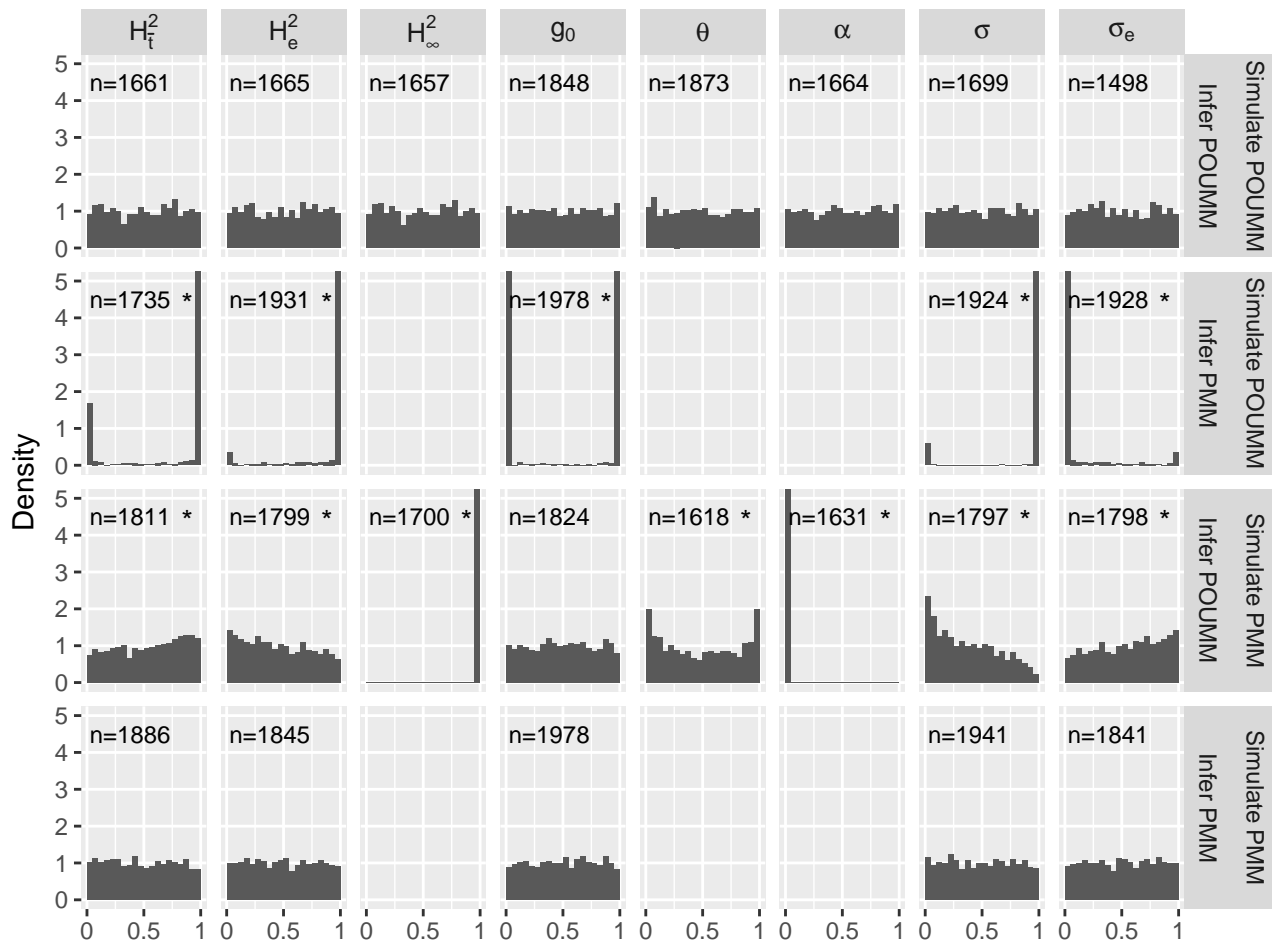

Figure 2: Posterior quantiles from simulation scenarios on a non-ultrametric tree ( $N = 4000$ ). Values tending to 1 indicate that the true value dominates the inferred posterior sample for most of the replications. This means that the model fit tends to underestimate the true parameter. The number  $n$  at the top of each histogram denotes the number of replications out of 2000 which reached acceptable MCMC convergence and mixing at the by the one millionth iteration. An asterisk indicates significant uniformity violation (Kolmogorov-Smirnov P-value  $< 0.01$ ).

201 significant deviation from uniformity of the posterior quantiles for the parameters  $H_t^2$ ,  $g_0$ ,  
202 and  $\sigma_e$  and  $H_e^2$ . The fact that most posterior quantiles for  $H_t^2$  and  $H_e^2$  are at the extremes  
203 of the histogram is indicative for a systematic negative or positive bias in the inferred  
204 parameters. These results indicate that the PMM can be a very unstable erroneous  
205 estimator of phylogenetic heritability when the data violates the Brownian motion  
206 assumption.

207

## DISCUSSION

208 A main advantage of a breadth-first approach with respect to to depth-first pruning  
209 implementations (e.g. diversitree (FitzJohn 2012) and geiger (Pennell et al. 2014)) is that  
210 most of the algebraic calculations are done on vectors instead of single numbers.  
211 Contemporary computer architectures and languages such as Matlab and R are optimized  
212 for vector operations. Therefore, an implementation of breadth-first pruning written in R is  
213 nearly as fast as an analogous (breadth-first-) or a depth-first implementation written in  
214 C++ (Supplementary Materials). Moreover, on multi-core systems, a breadth-first  
215 implementation can be easily parallelized by linking to OpenMP- or GPU-accelerated  
216 libraries.

217 The OU process has been applied as a model for stabilizing selection in  
218 macro-evolutionary studies (LANDE 1976; Felsenstein 1988; Hansen 1997; Harmon et al.  
219 2010). Most of these studies and the accompanying software packages assume that the  
220 whole trait evolves according to an OU process, usually disregarding the presence of a  
221 biologically relevant non-heritable component or of a measurement error with a-priori  
222 known variance (FitzJohn 2012). When modelling species trait evolution, a non-heritable  
223 ecological contribution may be well justified and may in fact be important to understand  
224 the full evolutionary process. When modeling pathogen evolution, the branching points in

225 the tree represent transmission events, and the environmental contribution is the  
226 contribution of the host immune system. Thus, for pathogens, it is crucial to incorporate  $e$   
227 in the model in order to quantify the importance of host- versus pathogen factors in trait  
228 formation (Alizon et al. 2010; Shirreff et al. 2013).

229 The idea to infer phylogenetic heritability assuming that  $g$  follows an OU process  
230 along the phylogeny has so far been discouraged mainly for interpretational and practical  
231 reasons: (i) in biology, individuals get selected based on their whole trait-values  $z$ , rather  
232 than the genotypic component  $g$  (unless  $e$  is simply measurement noise); (ii) small  
233 ultrametric macro-evolutionary trees do not contain sufficient signal for a simultaneous  
234 inference of the OU-and environmental variance (Housworth, Martins, and Lynch 2004).  
235 We argue that modeling an OU process on  $z$  rather than  $g$  comes at the cost of additional  
236 parameters and reduced statistical power, because it necessitates to account for jumps in  $z$   
237 at the branching points as well as the unobserved speciation/transmission events along the  
238 tree. Conversely, assuming that the OU process acts directly on  $g$  rather than  $z$  is  
239 mathematically more convenient, because it allows the inference of a single continuous  
240 OU-process along the tree, while adding  $e$  only at the tips of the tree.

241 Finally, our simulations suggest that the POUMM could make a suitable estimator  
242 of phylogenetic heritability when the trait is subject to stabilizing selection, but also, tends  
243 to be more robust than PMM towards model mis-specification (Fig. 2). Thus, the  
244 POUMM R-package should provide a useful tool for future phylogenetic analysis in  
245 epidemiology and macro-evolution.

## 246 SUPPLEMENTARY MATERIAL

247 The proof of theorem 1 and further details on the simulation setup can be found in  
248 an online appendix. A performance benchmark for the breadth-first pruning algorithm is

249 provided in the supplementary file `CompareOUPackages.html`. The user manual for the  
250 POUMM package is provided in the package vignette.

251

## FUNDING

252 V.M. and T.S. thank ETH Zürich for funding. T.S. is supported in part by the  
253 European Research Council under the 7th Framework Programme of the European  
254 Commission (PhyPD: Grant Agreement Number 335529).

255

## ACKNOWLEDGEMENTS

256 We thank Dr. Krzysztof Bartoszek for valuable insights on the Ornstein-Uhlenbeck  
257 process.

258

## REFERENCES

259 Alizon, Samuel, Viktor von Wyl, Tanja Stadler, Roger D Kouyos, Sabine Yerly,  
260 Bernard Hirschel, Jürg Böni, et al. 2010. “Phylogenetic approach reveals that virus  
261 genotype largely determines HIV set-point viral load.” *PLoS Pathogens* 6 (9): e1001123.

262 Analytics, Revolution, and Steve Weston. 2015. “Provides Foreach Looping  
263 Construct for R [R package foreach version 1.4.3].”

264 Cook, Samantha R, Andrew Gelman, and Donald B Rubin. 2006. “Validation of  
265 Software for Bayesian Models Using Posterior Quantiles.” *Journal of Computational and*  
266 *Graphical Statistics* 15 (3): 675–92.

267 Dowle, Matthew, T Short, S Liangolou, and A Srinivasan. 2014. “data.table:  
268 Extension of data.frame,” July, 9.

269 Eddelbuettel, Dirk, and Conrad Sanderson. 2014. “RcppArmadillo - Accelerating R

270 with high-performance C++ linear algebra.” *Computational Statistics & Data Analysis* 71:  
271 1054–63.

272 Felsenstein, J. 1973. “Maximum-likelihood estimation of evolutionary trees from  
273 continuous characters.” *American Journal of Human Genetics* 25 (5): 471–92.

274 ———. 1988. “Phylogenies And Quantitative Characters.” *Annual Review of*  
275 *Ecology and Systematics* 19 (1): 445–71.

276 FitzJohn, Richard G. 2012. “Diversitree: comparative phylogenetic analyses of  
277 diversification in R.” *Methods in Ecology and Evolution* 3 (6): 1084–92.

278 Goolsby, Eric W, Jorn Bruggeman, and Cécile Ané. 2016. “Rphylopars: fast  
279 multivariate phylogenetic comparative methods for missing data and within-species  
280 variation.” *Methods in Ecology and Evolution* 8 (1): 22–27.

281 Grimmett, Geoffrey, and David Stirzaker. 2001. *Probability and Random Processes*.  
282 Oxford University Press.

283 Hankin, RKS. 2006. “Special functions in R: introducing the gsl package.” *R News*.

284 Hansen, Thomas F. 1997. “Stabilizing Selection and the Comparative Analysis of  
285 Adaptation.” *Evolution; International Journal of Organic Evolution* 51 (5): 1341–51.

286 Hansen, Thomas F, and Krzysztof Bartoszek. 2012. “Interpreting the evolutionary  
287 regression: the interplay between observational and biological errors in phylogenetic  
288 comparative studies.” *Systematic Biology* 61 (3): 413–25.

289 Harmon, Luke J, Jonathan B Losos, T Jonathan Davies, Rosemary G Gillespie,  
290 John L Gittleman, W Bryan Jennings, Kenneth H Kozak, et al. 2010. “Early bursts of  
291 body size and shape evolution are rare in comparative data.” *Evolution; International*  
292 *Journal of Organic Evolution* 64 (8): 2385–96.

293 Housworth, Elizabeth A, Emília P Martins, and Michael Lynch. 2004. “The  
294 phylogenetic mixed model.” *The American Naturalist* 163 (1): 84–96.

295 LANDE, R. 1976. “Natural-Selection and Random Genetic Drift in Phenotypic



- 296 Evolution.” *Evolution; International Journal of Organic Evolution* 30 (2): 314–34.
- 297       Lynch, Michael. 1991. “Methods for the Analysis of Comparative Data in  
298 Evolutionary Biology.” *Evolution; International Journal of Organic Evolution* 45 (5):  
299 1065–80.
- 300       Lynch, Michael, and Bruce Walsh. 1998. *Genetics and Analysis of Quantitative*  
301 *Traits*. Sinauer Associates Incorporated.
- 302       Maechler, Martin. 2014. “Rmpfr: R MPFR - Multiple Precision Floating-Point  
303 Reliable.”
- 304       Manceau, Marc, Amaury Lambert, and Helene Morlon. 2016. “A unifying  
305 comparative phylogenetic framework including traits coevolving across interacting  
306 lineages.” *Systematic Biology*, December, syw115.
- 307       Ornstein, L S, and F Zernike. 1919. “The theory of the Brownian Motion and  
308 statistical mechanics.” *Proceedings of the Koninklijke Akademie Van Wetenschappen Te*  
309 *Amsterdam* 21 (1/5): 109–14.
- 310       O’Meara, Brian C. 2012. “Evolutionary Inferences from Phylogenies: A Review of  
311 Methods.” *Dx.doi.org* 43 (1): 267–85.
- 312       ———. 2016. “CRAN Task View: Phylogenetics, Especially Comparative  
313 Methods,” December.
- 314       Paradis, E, J Claude, and K Strimmer. 2004. “APE: Analyses of Phylogenetics and  
315 Evolution in R language.” *Bioinformatics* 20 (2): 289–90.
- 316       Pennell, Matthew W, Jonathan M Eastman, Graham J Slater, Joseph W Brown,  
317 Josef C Uyeda, Richard G FitzJohn, Michael E Alfaro, and Luke J Harmon. 2014. “geiger  
318 v2.0: an expanded suite of methods for fitting macroevolutionary models to phylogenetic  
319 trees.” *Bioinformatics* 30 (15): 2216–8.
- 320       Plummer, Martyn, Nicky Best, Kate Cowles, and Karen Vines. 2006. “CODA:

- 321 Convergence Diagnosis and Output Analysis for MCMC.” *R News* 6: 7–11.
- 322 R Core Team. 2013. “R: A Language and Environment for Statistical Computing.”
- 323 Sanderson, Conrad, and Ryan Curtin. 2016. “Armadillo: a template-based C++
- 324 library for linear algebra.” *Journal of Open Source Software* 1 (2).
- 325 Scheidegger, Andreas. 2012. “adaptMCMC: Implementation of a generic adaptive
- 326 Monte Carlo Markov Chain sampler.”
- 327 Shirreff, George, Samuel Alizon, Anne Cori, Huldrych F Günthard, Oliver
- 328 Laeyendecker, Ard van Sighem, Daniela Bezemer, and Christophe Fraser. 2013. “How
- 329 effectively can HIV phylogenies be used to measure heritability?” *Evolution, Medicine, and*
- 330 *Public Health* 2013 (1): 209–24.
- 331 Uhlenbeck, G E, and L S Ornstein. 1930. “On the Theory of the Brownian
- 332 Motion.” *Physical Review* 36 (5): 823–41.
- 333 Vihola, Matti. 2012. “Robust adaptive Metropolis algorithm with coerced
- 334 acceptance rate.” *Statistics and Computing* 22 (5): 997–1008.
- 335 Wickham, Hadley. 2009. “ggplot2 - Elegant Graphics for Data Analysis.” *Use R*.
